# Supplementary material for: ICOS-dependent extrafollicular helper T cells elicit IgG production via IL-21 in systemic autoimmunity
Source: PubMed Central journal article supplement — J Exp Med. 2008 Nov 24;205(12):2873–86. doi: 10.1084/jem.20080840 (PMC2585848; doi:10.1084/jem.20080840), 2008-11-24
Supplement: jem.20080840_1.pdf [file jem.20080840_1.pdf]

**Table S1.** Genotype of microsatellite markers within autoimmune susceptibility loci of a sampling of mice used in the study

| Marker--> |          | D4Mit17 | D4Mit9 | D4Mit146 | D4Mit12 | D4Mit33 | D5Mit145 | D5Mit13 | D5Mit356 | D5Mit24 | D7Mit57 | D7Mit82 | D7Mit211 | D7Mit147 | D7Mit39 | D10Mit51 | D10Mit15 | D10Mit11 | D10Mit269 | D17Mit16 | Tnf  |
|-----------|----------|---------|--------|----------|---------|---------|----------|---------|----------|---------|---------|---------|----------|----------|---------|----------|----------|----------|-----------|----------|------|
| Chr-->    |          | 4       | 4      | 4        | 4       | 4       | 5        | 5       | 5        | 5       | 7       | 7       | 7        | 7        | 7       | 10       | 10       | 10       | 10        | 17       | 17   |
| cM-->     |          | 31.4    | 44.5   | 53.6     | 57.6    | 79.0    | 0.0      | 20.0    | 41.0     | 60.0    | 4.0     | 25.0    | 27.8     | 37.0     | 50.3    | 9.0      | 35.0     | 50.0     | 70.0      | 17.4     | 19.1 |
| locus-->  |          | Lmb1    | Lmb1   | Lmb1     | Lmb1    | Lmb1    | Lmb2     | Lmb2    | Lmb2     | Lmb2    | Lmb3    | Lmb3    | Lmb3     | Lmb3     | Lmb3    | Lmb4     | Lmb4     | Lmb4     | Lmb4      | MHC      | MHC  |
| Mouse     | Group    |         |        |          |         |         |          |         |          |         |         |         |          |          |         |          |          |          |           |          |      |
| ML1       | Icos +/+ | MRL     | MRL    | MRL      | MRL     | MRL     | MRL      | MRL     | MRL      | MRL     | MRL     | MRL     | MRL      | MRL      | MRL     | MRL      | MRL      | MRL      | MRL       | MRL      | MRL  |
| ML6       | Icos +/+ | MRL     | MRL    | MRL      | MRL     | MRL     | MRL      | MRL     | MRL      | MRL     | MRL     | MRL     | MRL      | MRL      | MRL     | MRL      | MRL      | MRL      | MRL       | MRL      | MRL  |
| ML10      | Icos +/+ | MRL     | MRL    | MRL      | MRL     | MRL     | MRL      | MRL     | MRL      | MRL     | MRL     | MRL     | MRL      | MRL      | MRL     | MRL      | MRL      | MRL      | MRL       | MRL      | MRL  |
| ML19      | Icos +/+ | MRL     | MRL    | MRL      | MRL     | MRL     | MRL      | MRL     | MRL      | MRL     | MRL     | MRL     | MRL      | MRL      | MRL     | MRL      | MRL      | MRL      | MRL       | MRL      | MRL  |
| MLI1      | Icos -/- | B6      | B6     | B6       | MRL     | MRL     | MRL      | MRL     | MRL      | MRL     | MRL     | MRL     | MRL      | MRL      | MRL     | MRL      | MRL      | MRL      | MRL       | MRL      | MRL  |
| MLI3      | Icos -/- | Het     | Het    | Het      | MRL     | MRL     | MRL      | MRL     | MRL      | MRL     | MRL     | MRL     | MRL      | MRL      | MRL     | MRL      | MRL      | MRL      | MRL       | MRL      | MRL  |
| MLI4      | Icos -/- | Het     | Het    | B6       | MRL     | MRL     | MRL      | MRL     | MRL      | MRL     | MRL     | MRL     | MRL      | MRL      | MRL     | MRL      | MRL      | MRL      | MRL       | MRL      | MRL  |
| MLI5      | Icos -/- | Het     | Het    | B6       | MRL     | MRL     | MRL      | MRL     | MRL      | MRL     | MRL     | MRL     | MRL      | MRL      | MRL     | MRL      | MRL      | MRL      | MRL       | MRL      | MRL  |
| MLI6      | Icos -/- | Het     | Het    | B6       | MRL     | MRL     | MRL      | MRL     | MRL      | MRL     | MRL     | MRL     | MRL      | MRL      | MRL     | MRL      | MRL      | MRL      | MRL       | MRL      | MRL  |
| MLI7      | Icos -/- | Het     | Het    | Het      | MRL     | MRL     | MRL      | MRL     | MRL      | MRL     | MRL     | MRL     | MRL      | MRL      | MRL     | MRL      | MRL      | MRL      | MRL       | MRL      | MRL  |
| MLI8      | Icos -/- | Het     | Het    | Het      | MRL     | MRL     | MRL      | MRL     | MRL      | MRL     | MRL     | MRL     | MRL      | MRL      | MRL     | MRL      | MRL      | MRL      | MRL       | MRL      | MRL  |
| MLI9      | Icos -/- | Het     | B6     | B6       | MRL     | MRL     | MRL      | MRL     | MRL      | MRL     | MRL     | MRL     | MRL      | MRL      | MRL     | MRL      | MRL      | MRL      | MRL       | MRL      | MRL  |
| MLI10     | Icos -/- | Het     | B6     | B6       | MRL     | MRL     | MRL      | MRL     | MRL      | MRL     | MRL     | MRL     | MRL      | MRL      | MRL     | MRL      | MRL      | MRL      | MRL       | MRL      | MRL  |
| MLI12     | Icos -/- | Het     | B6     | B6       | MRL     | MRL     | MRL      | MRL     | MRL      | MRL     | MRL     | MRL     | MRL      | MRL      | MRL     | MRL      | MRL      | MRL      | MRL       | MRL      | MRL  |
| MLI13     | Icos -/- | MRL     | MRL    | MRL      | MRL     | MRL     | MRL      | MRL     | MRL      | MRL     | MRL     | MRL     | MRL      | MRL      | MRL     | MRL      | MRL      | MRL      | MRL       | MRL      | MRL  |
| MLI14     | Icos -/- | B6      | B6     | B6       | MRL     | MRL     | MRL      | MRL     | MRL      | MRL     | MRL     | MRL     | MRL      | MRL      | MRL     | MRL      | MRL      | MRL      | MRL       | MRL      | MRL  |
| MLI21     | Icos -/- | Het     | B6     | B6       | MRL     | MRL     | MRL      | MRL     | MRL      | MRL     | MRL     | MRL     | MRL      | MRL      | MRL     | MRL      | MRL      | MRL      | MRL       | MRL      | MRL  |

Non-MRL-derived alleles are shaded (light gray, B6/MRL heterozygous; dark gray, homozygous B6). A separate PCR established that these alleles were derived from the B6, not the 129, background.
